# Supplementary material
Source: PubMed Central journal article supplement (PMC4285303)
Supplement: humu0035-0927-SD1.pdf [file humu0035-0927-SD1.pdf]

## Supporting Information: Query Examples for Human Diseases

### Table of Contents

- [Querying with SPARQL 1.1](#)
- [Number of annotations that overlap with a disease variant](#)
- [Number of annotation types that overlap with a disease variant](#)
- [Active site annotations that overlap with a disease variant](#)
- [Disulfide bond annotations that overlap with a disease variant](#)

### Querying with SPARQL 1.1

The main UniProt website <http://www.uniprot.org> is document centric to serve users who search for entries of their interest to browse them. It has limited support for analytical queries. To fill this gap, the UniProt consortium provides <http://beta.sparql.uniprot.org> for answering analytical queries and gather statistics on the UniProt data using SPARQL 1.1, a standardized query language that is resource centric.

All queries below where run against UniProtKB release 2014\_01.

### Number of annotations that overlap with a disease variant

```

PREFIX uniprotkb:<http://purl.uniprot.org/uniprot/>
PREFIX taxon:<http://purl.uniprot.org/taxonomy/>
PREFIX faldo:<http://biohackathon.org/resource/faldo#>
PREFIX up:<http://purl.uniprot.org/core/>
PREFIX rdf:<http://www.w3.org/1999/02/22-rdf-syntax-ns#>
PREFIX rdfs:<http://www.w3.org/2000/01/rdf-schema#>
PREFIX owl:<http://www.w3.org/2002/07/owl#>
SELECT (COUNT(?protein) as ?protCount)
WHERE
{
  ?protein a up:Protein ;
    up:organism taxon:9606 ;
    up:annotation ?variantAnnot , ?overlapAnnot , ?diseaseAnnot .
  ?variantAnnot a up:Natural_Variant_Annotation ;
    rdfs:comment ?variantComment ;
    up:range ?variantRange .
  ?variantRange faldo:begin/faldo:position ?variantBegin ;
    faldo:end/faldo:position ?variantEnd .
  ?diseaseAnnot a up:Disease_Annotation ;
    up:disease ?disease .
  ?disease up:mnemonic ?diseaseMnemonic .
  ?overlapAnnot a ?annotType ;
    up:range ?annotRange .
  ?annotRange faldo:begin/faldo:position ?annotBegin .

```

OPTIONAL

```
{
  ?annotRange faldo:end/faldo:position ?annotEnd .
}
FILTER(contains(?variantComment, ?diseaseMnemonic))
FILTER((?annotBegin >= ?variantBegin && ?annotBegin <= ?variantEnd) || (?annotEnd >=
?variantBegin && ?annotEnd <= ?variantEnd))
FILTER(!sameTerm(?annotType, up:Natural_Variant_Annotation))
}
```

There are 2722 annotations overlapping a disease related variant.

### Number of annotation types that overlap with a disease variant

```
PREFIX uniprotkb:<http://purl.uniprot.org/uniprot/>
PREFIX taxon:<http://purl.uniprot.org/taxonomy/>
PREFIX faldo:<http://biohackathon.org/resource/faldo#>
PREFIX up:<http://purl.uniprot.org/core/>
PREFIX rdf:<http://www.w3.org/1999/02/22-rdf-syntax-ns#>
PREFIX rdfs:<http://www.w3.org/2000/01/rdf-schema#>
PREFIX owl:<http://www.w3.org/2002/07/owl#>
SELECT (COUNT(?protein) as ?protCount) ?annotTypeString
WHERE
{
  ?protein a up:Protein ;
    up:organism taxon:9606 ;
    up:annotation ?variantAnnot , ?overlapAnnot , ?diseaseAnnot .
  ?variantAnnot a up:Natural_Variant_Annotation ;
    rdfs:comment ?variantComment ;
    up:range ?variantRange .
  ?variantRange faldo:begin/faldo:position ?variantBegin ;
    faldo:end/faldo:position ?variantEnd .
  ?diseaseAnnot a up:Disease_Annotation ;
    up:disease ?disease .
  ?disease up:mnemonic ?diseaseMnemonic .
  ?overlapAnnot a ?annotType ;
    up:range ?annotRange .
  ?annotRange faldo:begin/faldo:position ?annotBegin .
  OPTIONAL
  {
    ?annotRange faldo:end/faldo:position ?annotEnd .
  }
  FILTER(contains(?variantComment, ?diseaseMnemonic))
  FILTER((?annotBegin >= ?variantBegin && ?annotBegin <= ?variantEnd) || (?annotEnd >=
?variantBegin && ?annotEnd <= ?variantEnd))
  FILTER(!sameTerm(?annotType, up:Natural_Variant_Annotation))
}
```

```

BIND(substr(str(?annotType), 30) as ?annotTypeString)
}
GROUP BY ?annotTypeString ORDER BY ?annotTypeString

```

| <b>Number of annotations</b> | <b>Type of annotation</b> |
|------------------------------|---------------------------|
| 44                           | Active Site               |
| 70                           | Alternative Sequence      |
| 411                          | Beta Strand               |
| 122                          | Binding Site              |
| 4                            | Calcium Binding           |
| 23                           | Chain                     |
| 10                           | Compositional Bias        |
| 3                            | Cross-link                |
| 643                          | Disulfide Bond            |
| 55                           | Domain Extent             |
| 4                            | Frameshift                |
| 52                           | Glycosylation             |
| 283                          | Helix                     |
| 3                            | Intramembrane             |
| 3                            | Lipidation                |
| 7                            | Mass Spectrometry         |
| 126                          | Metal Binding             |
| 111                          | Modified Residue          |
| 18                           | Motif                     |
| 266                          | Mutagenesis               |
| 28                           | NP Binding                |
| 1                            | Non-standard Residue      |
| 3                            | Nucleotide Binding        |
| 1                            | Peptide                   |
| 3                            | Propeptide                |
| 57                           | Region                    |
| 14                           | Repeat                    |
| 85                           | Sequence Conflict         |
| 39                           | Site                      |
| 82                           | Topological Domain        |
| 69                           | Transmembrane             |
| 77                           | Turn                      |
| 5                            | Zinc Finger               |

**Active site annotations that overlap with a disease variant**

```

PREFIX uniprotkb:<http://purl.uniprot.org/uniprot/>
PREFIX taxon:<http://purl.uniprot.org/taxonomy/>
PREFIX faldo:<http://biohackathon.org/resource/faldo#>
PREFIX up:<http://purl.uniprot.org/core/>
PREFIX rdf:<http://www.w3.org/1999/02/22-rdf-syntax-ns#>
PREFIX rdfs:<http://www.w3.org/2000/01/rdf-schema#>
PREFIX owl:<http://www.w3.org/2002/07/owl#>
SELECT ?protein ?diseaseMnemonic ?annotBegin ?annotComment
WHERE
{
  ?protein a up:Protein ;
    up:organism taxon:9606 ;
    up:annotation ?variantAnnot , ?overlapAnnot , ?diseaseAnnot .
  ?variantAnnot a up:Natural_Variant_Annotation ;
    rdfs:comment ?variantComment ;
    up:range ?variantRange .
  ?variantRange faldo:begin/faldo:position ?variantBegin ;
    faldo:end/faldo:position ?variantEnd .
  ?diseaseAnnot a up:Disease_Annotation ;
    up:disease ?disease .
  ?disease up:mnemonic ?diseaseMnemonic .
  ?overlapAnnot a up:Active_Site_Annotation ;
    up:range ?annotRange .
  ?annotRange faldo:begin/faldo:position ?annotBegin ;
    faldo:end/faldo:position ?annotEnd .
  OPTIONAL { ?overlapAnnot rdfs:comment ?annotComment . }
  FILTER(contains(?variantComment, ?diseaseMnemonic))
  FILTER(?annotBegin >= ?variantBegin && ?annotBegin <= ?variantEnd)
}

```

| <b>Protein</b> | <b>Disease mnemonic</b> | <b>Active site position</b> | <b>Active site comment</b>       |
|----------------|-------------------------|-----------------------------|----------------------------------|
| P06280         | FD                      | 170                         | Nucleophile                      |
| P06280         | FD                      | 231                         | Proton donor                     |
| P03950         | ALS9                    | 138                         | Proton donor                     |
| O43520         | BRIC1                   | 454                         | 4-aspartylphosphate intermediate |
| Q04656         | MNKD                    | 1044                        | 4-aspartylphosphate intermediate |
| Q06187         | XLA                     | 521                         | Proton acceptor                  |
| Q06187         | XLA                     | 521                         | Proton acceptor                  |
| Q06187         | XLA                     | 521                         | Proton acceptor                  |
| O14773         | CLN2                    | 475                         | Charge relay system              |
| P20807         | LGMD2A                  | 334                         |                                  |
| P53634         | PLS                     | 405                         |                                  |

| <b>Protein</b> | <b>Disease mnemonic</b> | <b>Active site position</b> | <b>Active site comment</b>      |
|----------------|-------------------------|-----------------------------|---------------------------------|
| P53634         | PLS                     | 405                         |                                 |
| P06276         | BChE deficiency         | 226                         | Acyl-ester intermediate         |
| P09417         | HPABH4C                 | 150                         | Proton acceptor                 |
| P00742         | FA10D                   | 322                         | Charge relay system             |
| P03951         | FA11D                   | 575                         | Charge relay system             |
| P00748         | FA12D                   | 461                         | Charge relay system             |
| P08709         | FA7D                    | 302                         | Charge relay system             |
| P08709         | FA7D                    | 302                         | Charge relay system             |
| P08709         | FA7D                    | 404                         | Charge relay system             |
| P00740         | HEMB                    | 411                         | Charge relay system             |
| P00740         | HEMB                    | 411                         | Charge relay system             |
| P35575         | GSD1A                   | 119                         | Proton donor                    |
| P06744         | HA-GPID                 | 389                         |                                 |
| Q92947         | GA1                     | 414                         | Proton acceptor                 |
| P49773         | NMAN                    | 112                         | Tele-AMP-histidine intermediate |
| P35475         | MPS1H                   | 182                         | Proton donor                    |
| P04180         | LCATD                   | 205                         | Charge relay system             |
| P06858         | LPL deficiency          | 183                         | Charge relay system             |
| P06858         | LPL deficiency          | 183                         | Charge relay system             |
| P06858         | LPL deficiency          | 183                         | Charge relay system             |
| P10253         | GSD2                    | 521                         |                                 |
| P10253         | GSD2                    | 521                         |                                 |
| P08253         | MONA                    | 404                         |                                 |
| P34949         | CDG1B                   | 295                         |                                 |
| Q99519         | SIALIDOSIS              | 370                         | Nucleophile                     |
| P00480         | OTCD                    | 303                         |                                 |
| P00480         | OTCD                    | 303                         |                                 |
| P35913         | RP40                    | 557                         | Proton donor                    |
| Q9H237         | FODH                    | 341                         |                                 |
| P60484         | CWS1                    | 124                         | Phosphocysteine intermediate    |
| P60484         | CWS1                    | 124                         | Phosphocysteine intermediate    |
| P00797         | RTD                     | 104                         |                                 |
| Q9NUW8         | SCAN1                   | 493                         | Proton donor                    |

**Disulfide bond annotations that overlap with a disease variant**

```

PREFIX uniprotkb:<http://purl.uniprot.org/uniprot/>
PREFIX taxon:<http://purl.uniprot.org/taxonomy/>
PREFIX faldo:<http://biohackathon.org/resource/faldo#>
PREFIX up:<http://purl.uniprot.org/core/>
PREFIX rdf:<http://www.w3.org/1999/02/22-rdf-syntax-ns#>
PREFIX rdfs:<http://www.w3.org/2000/01/rdf-schema#>
PREFIX owl:<http://www.w3.org/2002/07/owl#>
SELECT ?protein ?diseaseMnemonic ?annotBegin ?variantSubstitution
WHERE
{
  ?protein a up:Protein ;
    up:organism taxon:9606 ;
    up:annotation ?variantAnnot , ?overlapAnnot , ?diseaseAnnot .
  ?variantAnnot a up:Natural_Variant_Annotation ;
    rdfs:comment ?variantComment ;
    up:range ?variantRange ;
    up:substitution ?variantSubstitution .
  ?variantRange faldo:begin/faldo:position ?variantBegin ;
    faldo:end/faldo:position ?variantEnd .
  ?diseaseAnnot a up:Disease_Annotation ;
    up:disease ?disease .
  ?disease up:mnemonic ?diseaseMnemonic .
  ?overlapAnnot a up:Disulfide_Bond_Annotation ;
    up:range ?annotRange .
  OPTIONAL { ?overlapAnnot rdfs:comment ?annotComment . }
  ?annotRange faldo:begin/faldo:position ?annotBegin ;
    faldo:end/faldo:position ?annotEnd .
  FILTER(!(bound(?annotComment) && sameTerm(?annotBegin, ?annotEnd))) #this removes
the interchain disulfidebonds
  FILTER(contains(?variantComment, ?diseaseMnemonic))
  FILTER(?annotBegin >= ?variantBegin && ?annotBegin <= ?variantEnd)
}

```

| <b>Protein</b> | <b>Disease mnemonic</b> | <b>Disulfide bond position</b> | <b>Variant substitution</b> |
|----------------|-------------------------|--------------------------------|-----------------------------|
| P43026         | AMDG                    | 400                            | Y                           |
| P78504         | ALGS1                   | 187                            | S                           |
| P78504         | ALGS1                   | 187                            | Y                           |
| P78504         | ALGS1                   | 220                            | F                           |
| P78504         | ALGS1                   | 229                            | G                           |
| P78504         | ALGS1                   | 229                            | Y                           |
| P78504         | ALGS1                   | 271                            | R                           |
| P78504         | ALGS1                   | 284                            | F                           |

| <b>Protein</b> | <b>Disease mnemonic</b> | <b>Disulfide bond position</b> | <b>Variant substitution</b> |
|----------------|-------------------------|--------------------------------|-----------------------------|
| P78504         | ALGS1                   | 438                            | F                           |
| P78504         | ALGS1                   | 693                            | Y                           |
| P78504         | ALGS1                   | 714                            | Y                           |
| P78504         | ALGS1                   | 731                            | S                           |
| P78504         | ALGS1                   | 740                            | R                           |
| P78504         | ALGS1                   | 753                            | R                           |
| Q04721         | ALGS2                   | 444                            | Y                           |
| P00441         | ALS1                    | 147                            | R                           |
| P03950         | ALS9                    | 63                             | W                           |
| P01008         | AT3D                    | 127                            | R                           |
| P01008         | AT3D                    | 160                            | Y                           |
| P01008         | AT3D                    | 462                            | F                           |
| P21802         | ABS2                    | 342                            | R                           |
| P21802         | ABS2                    | 342                            | S                           |
| P35556         | DA9                     | 1142                           | F                           |
| P35556         | DA9                     | 1142                           | R                           |
| P35556         | DA9                     | 1156                           | F                           |
| P35556         | DA9                     | 1198                           | Y                           |
| P35556         | DA9                     | 1240                           | R                           |
| P35556         | DA9                     | 1246                           | F                           |
| P35556         | DA9                     | 1253                           | W                           |
| P35556         | DA9                     | 1253                           | Y                           |
| P35556         | DA9                     | 1257                           | W                           |
| P35556         | DA9                     | 1268                           | R                           |
| P35556         | DA9                     | 1384                           | F                           |
| P35556         | DA9                     | 1384                           | Y                           |
| P35556         | DA9                     | 1425                           | R                           |
| P35556         | DA9                     | 1434                           | S                           |
| P20933         | AGU                     | 163                            | S                           |
| P20933         | AGU                     | 306                            | R                           |
| P25445         | ALPS1A                  | 82                             | R                           |
| P07359         | BSS                     | 225                            | S                           |
| P04001         | BCM                     | 203                            | R                           |
| P04000         | BCM                     | 203                            | R                           |
| P21589         | CALJA                   | 358                            | Y                           |
| O75096         | CLSS                    | 160                            | Y                           |
| Q9UM47         | CADASIL                 | 43                             | G                           |

| <b>Protein</b> | <b>Disease mnemonic</b> | <b>Disulfide bond position</b> | <b>Variant substitution</b> |
|----------------|-------------------------|--------------------------------|-----------------------------|
| Q9UM47         | CADASIL                 | 49                             | F                           |
| Q9UM47         | CADASIL                 | 49                             | Y                           |
| Q9UM47         | CADASIL                 | 65                             | S                           |
| Q9UM47         | CADASIL                 | 67                             | Y                           |
| Q9UM47         | CADASIL                 | 76                             | R                           |
| Q9UM47         | CADASIL                 | 76                             | W                           |
| Q9UM47         | CADASIL                 | 87                             | R                           |
| Q9UM47         | CADASIL                 | 87                             | Y                           |
| Q9UM47         | CADASIL                 | 93                             | F                           |
| Q9UM47         | CADASIL                 | 93                             | Y                           |
| Q9UM47         | CADASIL                 | 106                            | W                           |
| Q9UM47         | CADASIL                 | 108                            | W                           |
| Q9UM47         | CADASIL                 | 108                            | Y                           |
| Q9UM47         | CADASIL                 | 117                            | F                           |
| Q9UM47         | CADASIL                 | 123                            | F                           |
| Q9UM47         | CADASIL                 | 123                            | Y                           |
| Q9UM47         | CADASIL                 | 128                            | Y                           |
| Q9UM47         | CADASIL                 | 134                            | W                           |
| Q9UM47         | CADASIL                 | 144                            | F                           |
| Q9UM47         | CADASIL                 | 144                            | S                           |
| Q9UM47         | CADASIL                 | 144                            | Y                           |
| Q9UM47         | CADASIL                 | 146                            | R                           |
| Q9UM47         | CADASIL                 | 155                            | S                           |
| Q9UM47         | CADASIL                 | 162                            | S                           |
| Q9UM47         | CADASIL                 | 174                            | F                           |
| Q9UM47         | CADASIL                 | 174                            | R                           |
| Q9UM47         | CADASIL                 | 174                            | Y                           |
| Q9UM47         | CADASIL                 | 183                            | F                           |
| Q9UM47         | CADASIL                 | 183                            | R                           |
| Q9UM47         | CADASIL                 | 183                            | S                           |
| Q9UM47         | CADASIL                 | 185                            | G                           |
| Q9UM47         | CADASIL                 | 185                            | R                           |
| Q9UM47         | CADASIL                 | 194                            | F                           |
| Q9UM47         | CADASIL                 | 194                            | R                           |
| Q9UM47         | CADASIL                 | 194                            | S                           |
| Q9UM47         | CADASIL                 | 194                            | Y                           |
| Q9UM47         | CADASIL                 | 201                            | Y                           |



| <b>Protein</b> | <b>Disease mnemonic</b> | <b>Disulfide bond position</b> | <b>Variant substitution</b> |
|----------------|-------------------------|--------------------------------|-----------------------------|
| Q9UM47         | CADASIL                 | 206                            | Y                           |
| Q9UM47         | CADASIL                 | 212                            | S                           |
| Q9UM47         | CADASIL                 | 222                            | G                           |
| Q9UM47         | CADASIL                 | 222                            | Y                           |
| Q9UM47         | CADASIL                 | 224                            | Y                           |
| Q9UM47         | CADASIL                 | 233                            | S                           |
| Q9UM47         | CADASIL                 | 233                            | Y                           |
| Q9UM47         | CADASIL                 | 240                            | S                           |
| Q9UM47         | CADASIL                 | 245                            | R                           |
| Q9UM47         | CADASIL                 | 251                            | R                           |
| Q9UM47         | CADASIL                 | 260                            | Y                           |
| Q9UM47         | CADASIL                 | 379                            | S                           |
| Q9UM47         | CADASIL                 | 395                            | R                           |
| Q9UM47         | CADASIL                 | 428                            | S                           |
| Q9UM47         | CADASIL                 | 428                            | Y                           |
| Q9UM47         | CADASIL                 | 440                            | G                           |
| Q9UM47         | CADASIL                 | 440                            | R                           |
| Q9UM47         | CADASIL                 | 446                            | S                           |
| Q9UM47         | CADASIL                 | 455                            | R                           |
| Q9UM47         | CADASIL                 | 484                            | F                           |
| Q9UM47         | CADASIL                 | 484                            | Y                           |
| Q9UM47         | CADASIL                 | 495                            | Y                           |
| Q9UM47         | CADASIL                 | 511                            | R                           |
| Q9UM47         | CADASIL                 | 542                            | Y                           |
| Q9UM47         | CADASIL                 | 549                            | Y                           |
| Q9UM47         | CADASIL                 | 775                            | S                           |
| Q9UM47         | CADASIL                 | 1015                           | R                           |
| Q9UM47         | CADASIL                 | 1261                           | R                           |
| Q9UM47         | CADASIL                 | 1261                           | Y                           |
| P50897         | CLN1                    | 45                             | Y                           |
| P50897         | CLN1                    | 152                            | Y                           |
| O14773         | CLN2                    | 365                            | R                           |
| O14773         | CLN2                    | 365                            | Y                           |
| P25189         | CMT1B                   | 50                             |                             |
| P04001         | CBD                     | 203                            | R                           |
| Q8IXK2         | CRCS1                   | 479                            | F                           |
| P06681         | C2D                     | 131                            | Y                           |

| <b>Protein</b> | <b>Disease mnemonic</b> | <b>Disulfide bond position</b> | <b>Variant substitution</b> |
|----------------|-------------------------|--------------------------------|-----------------------------|
| P02748         | C9D                     | 119                            | G                           |
| P00746         | CFDD                    | 214                            | R                           |
| P08603         | CFHD                    | 431                            | S                           |
| P08603         | CFHD                    | 536                            | R                           |
| P08603         | CFHD                    | 673                            | S                           |
| P08603         | CFHD                    | 959                            | Y                           |
| P27539         | CTHM                    | 267                            | Y                           |
| P98172         | CFNS                    | 153                            | S                           |
| P98172         | CFNS                    | 153                            | Y                           |
| P21802         | CS                      | 278                            | F                           |
| P21802         | CS                      | 278                            | Y                           |
| P21802         | CS                      | 342                            | F                           |
| P21802         | CS                      | 342                            | R                           |
| P21802         | CS                      | 342                            | S                           |
| P21802         | CS                      | 342                            | W                           |
| P21802         | CS                      | 342                            | Y                           |
| O95967         | ARCL1B                  | 267                            | Y                           |
| P25189         | DSS                     | 127                            | Y                           |
| P01185         | NDI                     | 52                             | R                           |
| P01185         | NDI                     | 58                             | F                           |
| P01185         | NDI                     | 59                             | R                           |
| P01185         | NDI                     | 59                             | Y                           |
| P01185         | NDI                     | 92                             | S                           |
| P01185         | NDI                     | 92                             | Y                           |
| P01185         | NDI                     | 98                             | G                           |
| P01185         | NDI                     | 98                             | S                           |
| P01185         | NDI                     | 104                            | F                           |
| P01185         | NDI                     | 104                            | G                           |
| P01185         | NDI                     | 105                            | R                           |
| P01185         | NDI                     | 105                            | Y                           |
| P01185         | NDI                     | 116                            | G                           |
| P01185         | NDI                     | 116                            | R                           |
| P01185         | NDI                     | 116                            | W                           |
| P16422         | DIAR5                   | 66                             | Y                           |
| Q9UNE0         | ECTD10B                 | 47                             | Y                           |
| Q9UNE0         | ECTD10B                 | 87                             | R                           |
| Q9UNE0         | ECTD10B                 | 148                            | R                           |

| <b>Protein</b> | <b>Disease mnemonic</b> | <b>Disulfide bond position</b> | <b>Variant substitution</b> |
|----------------|-------------------------|--------------------------------|-----------------------------|
| P20908         | EDS1                    | 1639                           | S                           |
| P16144         | EB-PA                   | 38                             | R                           |
| P16144         | EB-PA                   | 61                             | Y                           |
| P16144         | EB-PA                   | 245                            | G                           |
| P16144         | EB-PA                   | 562                            | R                           |
| P06280         | FD                      | 52                             | R                           |
| P06280         | FD                      | 52                             | S                           |
| P06280         | FD                      | 56                             | F                           |
| P06280         | FD                      | 56                             | G                           |
| P06280         | FD                      | 56                             | Y                           |
| P06280         | FD                      | 94                             | S                           |
| P06280         | FD                      | 94                             | Y                           |
| P06280         | FD                      | 142                            | R                           |
| P06280         | FD                      | 142                            | Y                           |
| P06280         | FD                      | 172                            | R                           |
| P06280         | FD                      | 172                            | Y                           |
| P06280         | FD                      | 202                            | W                           |
| P06280         | FD                      | 202                            | Y                           |
| P06280         | FD                      | 223                            | G                           |
| P06280         | FD                      | 378                            | Y                           |
| P08709         | FA7D                    | 82                             | F                           |
| P08709         | FA7D                    | 82                             | R                           |
| P08709         | FA7D                    | 121                            | F                           |
| P08709         | FA7D                    | 151                            | S                           |
| P08709         | FA7D                    | 195                            | R                           |
| P08709         | FA7D                    | 238                            | Y                           |
| P08709         | FA7D                    | 254                            | R                           |
| P08709         | FA7D                    | 254                            | Y                           |
| P08709         | FA7D                    | 370                            | F                           |
| P08709         | FA7D                    | 389                            | G                           |
| P00742         | FA10D                   | 149                            | Y                           |
| P00742         | FA10D                   | 151                            | Y                           |
| P00742         | FA10D                   | 390                            | F                           |
| P00742         | FA10D                   | 404                            | R                           |
| P03951         | FA11D                   | 46                             | F                           |
| P03951         | FA11D                   | 56                             | R                           |
| P03951         | FA11D                   | 140                            | Y                           |

| <b>Protein</b> | <b>Disease mnemonic</b> | <b>Disulfide bond position</b> | <b>Variant substitution</b> |
|----------------|-------------------------|--------------------------------|-----------------------------|
| P03951         | FA11D                   | 255                            | Y                           |
| P03951         | FA11D                   | 514                            | F                           |
| P00748         | FA12D                   | 590                            | S                           |
| P05160         | FA13BD                  | 450                            | F                           |
| P19438         | FHF                     | 59                             | R                           |
| P19438         | FHF                     | 59                             | S                           |
| P19438         | FHF                     | 62                             | G                           |
| P19438         | FHF                     | 62                             | Y                           |
| P19438         | FHF                     | 81                             | F                           |
| P19438         | FHF                     | 99                             | S                           |
| P19438         | FHF                     | 117                            | R                           |
| P19438         | FHF                     | 117                            | Y                           |
| P01130         | FH                      | 46                             | S                           |
| P01130         | FH                      | 89                             | Y                           |
| P01130         | FH                      | 95                             | G                           |
| P01130         | FH                      | 116                            | R                           |
| P01130         | FH                      | 134                            | F                           |
| P01130         | FH                      | 134                            | W                           |
| P01130         | FH                      | 160                            | Y                           |
| P01130         | FH                      | 173                            | W                           |
| P01130         | FH                      | 184                            | Y                           |
| P01130         | FH                      | 197                            | R                           |
| P01130         | FH                      | 222                            | Y                           |
| P01130         | FH                      | 231                            | G                           |
| P01130         | FH                      | 248                            | Y                           |
| P01130         | FH                      | 261                            | F                           |
| P01130         | FH                      | 276                            | R                           |
| P01130         | FH                      | 276                            | Y                           |
| P01130         | FH                      | 302                            | W                           |
| P01130         | FH                      | 302                            | Y                           |
| P01130         | FH                      | 313                            | Y                           |
| P01130         | FH                      | 318                            | F                           |
| P01130         | FH                      | 318                            | R                           |
| P01130         | FH                      | 329                            | F                           |
| P01130         | FH                      | 329                            | Y                           |
| P01130         | FH                      | 338                            | S                           |
| P01130         | FH                      | 358                            | Y                           |

| <b>Protein</b> | <b>Disease mnemonic</b> | <b>Disulfide bond position</b> | <b>Variant substitution</b> |
|----------------|-------------------------|--------------------------------|-----------------------------|
| P01130         | FH                      | 368                            | R                           |
| P01130         | FH                      | 379                            | Y                           |
| P01130         | FH                      | 667                            | Y                           |
| P01130         | FH                      | 677                            | R                           |
| P07911         | HNFJ1                   | 77                             | Y                           |
| P07911         | HNFJ1                   | 126                            | R                           |
| P07911         | HNFJ1                   | 148                            | W                           |
| P07911         | HNFJ1                   | 148                            | Y                           |
| P78363         | FFM                     | 1488                           | R                           |
| P04062         | GD                      | 55                             | S                           |
| P07602         | AGD                     | 388                            | F                           |
| Q07699         | GEFS+1                  | 121                            | W                           |
| P08514         | GT                      | 161                            | W                           |
| P08514         | GT                      | 705                            | R                           |
| P05106         | GT                      | 64                             | Y                           |
| P05106         | GT                      | 400                            | Y                           |
| P05106         | GT                      | 532                            | Y                           |
| P05106         | GT                      | 568                            | R                           |
| P05106         | GT                      | 586                            | F                           |
| P05106         | GT                      | 586                            | R                           |
| P05106         | GT                      | 601                            | R                           |
| Q99972         | GLC1A                   | 245                            | Y                           |
| Q99972         | GLC1A                   | 433                            | R                           |
| P10253         | GSD2                    | 103                            | G                           |
| P10253         | GSD2                    | 103                            | R                           |
| P10253         | GSD2                    | 108                            | G                           |
| P10253         | GSD2                    | 127                            | F                           |
| P07686         | GM2G2                   | 309                            | Y                           |
| P07686         | GM2G2                   | 534                            | Y                           |
| P17900         | GM2GAB                  | 138                            | R                           |
| Q30201         | HFE1                    | 282                            | Y                           |
| P81172         | HFE2B                   | 70                             | R                           |
| P81172         | HFE2B                   | 78                             | Y                           |
| P13987         | HACD59                  | 89                             | Y                           |
| P08603         | AHUS1                   | 325                            | Y                           |
| P08603         | AHUS1                   | 630                            | W                           |
| P08603         | AHUS1                   | 673                            | Y                           |

| <b>Protein</b> | <b>Disease mnemonic</b> | <b>Disulfide bond position</b> | <b>Variant substitution</b> |
|----------------|-------------------------|--------------------------------|-----------------------------|
| P08603         | AHUS1                   | 915                            | S                           |
| P08603         | AHUS1                   | 1043                           | R                           |
| P08603         | AHUS1                   | 1163                           | W                           |
| P15529         | AHUS2                   | 35                             | Y                           |
| P01024         | AHUS5                   | 1158                           | W                           |
| P00451         | HEMA                    | 172                            | W                           |
| P00451         | HEMA                    | 198                            | G                           |
| P00451         | HEMA                    | 267                            | Y                           |
| P00451         | HEMA                    | 348                            | R                           |
| P00451         | HEMA                    | 348                            | S                           |
| P00451         | HEMA                    | 348                            | Y                           |
| P00451         | HEMA                    | 1877                           | R                           |
| P00451         | HEMA                    | 1877                           | Y                           |
| P00451         | HEMA                    | 2040                           | Y                           |
| P00451         | HEMA                    | 2193                           | G                           |
| P00451         | HEMA                    | 2345                           | S                           |
| P00451         | HEMA                    | 2345                           | Y                           |
| P00740         | HEMB                    | 97                             | S                           |
| P00740         | HEMB                    | 102                            | R                           |
| P00740         | HEMB                    | 108                            | S                           |
| P00740         | HEMB                    | 119                            | F                           |
| P00740         | HEMB                    | 119                            | R                           |
| P00740         | HEMB                    | 134                            | Y                           |
| P00740         | HEMB                    | 155                            | F                           |
| P00740         | HEMB                    | 170                            | F                           |
| P00740         | HEMB                    | 178                            | R                           |
| P00740         | HEMB                    | 178                            | W                           |
| P00740         | HEMB                    | 252                            | S                           |
| P00740         | HEMB                    | 252                            | Y                           |
| P00740         | HEMB                    | 268                            | W                           |
| P00740         | HEMB                    | 382                            | Y                           |
| P00740         | HEMB                    | 396                            | F                           |
| P00740         | HEMB                    | 396                            | S                           |
| P00740         | HEMB                    | 407                            | R                           |
| P00740         | HEMB                    | 407                            | S                           |
| P00740         | HEMB                    | 435                            | Y                           |
| Q9BX67         | HDBSCC                  | 219                            | Y                           |

| <b>Protein</b> | <b>Disease mnemonic</b> | <b>Disulfide bond position</b> | <b>Variant substitution</b> |
|----------------|-------------------------|--------------------------------|-----------------------------|
| Q6UXH8         | HLLS                    | 174                            | R                           |
| P05155         | HAE                     | 130                            | Y                           |
| O95477         | HDLD1                   | 1477                           | R                           |
| P07949         | HSCR1                   | 142                            | S                           |
| P58335         | HFS                     | 218                            | R                           |
| P32004         | HSAS                    | 264                            | Y                           |
| P32004         | HSAS                    | 497                            | Y                           |
| P11362         | HH2                     | 101                            | F                           |
| P11362         | HH2                     | 178                            | S                           |
| P11362         | HH2                     | 277                            | Y                           |
| Q8N6C5         | CHTE                    | 942                            | R                           |
| P16473         | CHNG1                   | 41                             | S                           |
| P08842         | IXL                     | 446                            | Y                           |
| O14836         | CVID2                   | 104                            | R                           |
| P25942         | HIGM3                   | 83                             | R                           |
| O14836         | IGAD2                   | 104                            | R                           |
| P06213         | IRAN type A             | 280                            | Y                           |
| Q8IU80         | IRIDA                   | 510                            | S                           |
| P01225         | IFSHD                   | 69                             | G                           |
| P21802         | JWS                     | 278                            | F                           |
| P21802         | JWS                     | 342                            | R                           |
| P21802         | JWS                     | 342                            | S                           |
| P36894         | JPS                     | 82                             | Y                           |
| P36894         | JPS                     | 124                            | R                           |
| P36894         | JPS                     | 130                            | R                           |
| P10912         | LARS                    | 56                             | S                           |
| P82279         | LCA8                    | 383                            | Y                           |
| P82279         | LCA8                    | 438                            | Y                           |
| P82279         | LCA8                    | 480                            | G                           |
| P82279         | LCA8                    | 480                            | R                           |
| P82279         | LCA8                    | 681                            | Y                           |
| P82279         | LCA8                    | 939                            | Y                           |
| P82279         | LCA8                    | 948                            | Y                           |
| P82279         | LCA8                    | 1174                           | G                           |
| P82279         | LCA8                    | 1218                           | F                           |
| P82279         | LCA8                    | 1321                           | S                           |
| P82279         | LCA8                    | 1332                           | F                           |

| <b>Protein</b> | <b>Disease mnemonic</b> | <b>Disulfide bond position</b> | <b>Variant substitution</b> |
|----------------|-------------------------|--------------------------------|-----------------------------|
| P06213         | LEPRCH                  | 301                            | Y                           |
| P60201         | HLD1                    | 220                            | Y                           |
| P60201         | HLD1                    | 228                            | Y                           |
| P15289         | MLD                     | 156                            | R                           |
| P15289         | MLD                     | 172                            | Y                           |
| P15289         | MLD                     | 300                            | F                           |
| P15289         | MLD                     | 489                            | G                           |
| P07602         | MLD-SAPB                | 241                            | S                           |
| O00584         | LCWM                    | 184                            | R                           |
| Q13326         | LGMD2C                  | 283                            | Y                           |
| P06858         | LPL deficiency          | 243                            | S                           |
| P06858         | LPL deficiency          | 266                            | W                           |
| P06858         | LPL deficiency          | 305                            | R                           |
| P06858         | LPL deficiency          | 310                            | Y                           |
| P06858         | LPL deficiency          | 445                            | Y                           |
| P26842         | LPFS2                   | 53                             | Y                           |
| P55000         | MDM                     | 77                             | R                           |
| P55000         | MDM                     | 99                             | Y                           |
| O00754         | MANSA                   | 55                             | F                           |
| O00754         | MANSA                   | 501                            | S                           |
| P35555         | MFS                     | 89                             | F                           |
| P35555         | MFS                     | 111                            | R                           |
| P35555         | MFS                     | 123                            | Y                           |
| P35555         | MFS                     | 129                            | Y                           |
| P35555         | MFS                     | 154                            | S                           |
| P35555         | MFS                     | 166                            | F                           |
| P35555         | MFS                     | 166                            | S                           |
| P35555         | MFS                     | 177                            | R                           |
| P35555         | MFS                     | 476                            | G                           |
| P35555         | MFS                     | 499                            | Y                           |
| P35555         | MFS                     | 504                            | F                           |
| P35555         | MFS                     | 541                            | Y                           |
| P35555         | MFS                     | 570                            | Y                           |
| P35555         | MFS                     | 587                            | Y                           |
| P35555         | MFS                     | 596                            | Y                           |
| P35555         | MFS                     | 598                            | W                           |
| P35555         | MFS                     | 611                            | R                           |



| <b>Protein</b> | <b>Disease mnemonic</b> | <b>Disulfide bond position</b> | <b>Variant substitution</b> |
|----------------|-------------------------|--------------------------------|-----------------------------|
| P35555         | MFS                     | 617                            | G                           |
| P35555         | MFS                     | 628                            | K                           |
| P35555         | MFS                     | 652                            | S                           |
| P35555         | MFS                     | 734                            | F                           |
| P35555         | MFS                     | 748                            | Y                           |
| P35555         | MFS                     | 750                            | G                           |
| P35555         | MFS                     | 776                            | G                           |
| P35555         | MFS                     | 776                            | Y                           |
| P35555         | MFS                     | 781                            | R                           |
| P35555         | MFS                     | 781                            | Y                           |
| P35555         | MFS                     | 790                            | Y                           |
| P35555         | MFS                     | 811                            | Y                           |
| P35555         | MFS                     | 816                            | S                           |
| P35555         | MFS                     | 832                            | Y                           |
| P35555         | MFS                     | 853                            | S                           |
| P35555         | MFS                     | 862                            | R                           |
| P35555         | MFS                     | 890                            | G                           |
| P35555         | MFS                     | 890                            | R                           |
| P35555         | MFS                     | 908                            | R                           |
| P35555         | MFS                     | 921                            | G                           |
| P35555         | MFS                     | 926                            | R                           |
| P35555         | MFS                     | 926                            | Y                           |
| P35555         | MFS                     | 1044                           | Y                           |
| P35555         | MFS                     | 1053                           | R                           |
| P35555         | MFS                     | 1055                           | G                           |
| P35555         | MFS                     | 1055                           | W                           |
| P35555         | MFS                     | 1055                           | Y                           |
| P35555         | MFS                     | 1068                           | G                           |
| P35555         | MFS                     | 1074                           | R                           |
| P35555         | MFS                     | 1086                           | W                           |
| P35555         | MFS                     | 1117                           | G                           |
| P35555         | MFS                     | 1117                           | Y                           |
| P35555         | MFS                     | 1129                           | Y                           |
| P35555         | MFS                     | 1153                           | S                           |
| P35555         | MFS                     | 1153                           | Y                           |
| P35555         | MFS                     | 1171                           | W                           |
| P35555         | MFS                     | 1223                           | Y                           |

| <b>Protein</b> | <b>Disease mnemonic</b> | <b>Disulfide bond position</b> | <b>Variant substitution</b> |
|----------------|-------------------------|--------------------------------|-----------------------------|
| P35555         | MFS                     | 1242                           | Y                           |
| P35555         | MFS                     | 1249                           | S                           |
| P35555         | MFS                     | 1265                           | R                           |
| P35555         | MFS                     | 1278                           | S                           |
| P35555         | MFS                     | 1284                           | G                           |
| P35555         | MFS                     | 1284                           | Y                           |
| P35555         | MFS                     | 1333                           | S                           |
| P35555         | MFS                     | 1339                           | Y                           |
| P35555         | MFS                     | 1350                           | F                           |
| P35555         | MFS                     | 1374                           | S                           |
| P35555         | MFS                     | 1389                           | R                           |
| P35555         | MFS                     | 1402                           | R                           |
| P35555         | MFS                     | 1429                           | S                           |
| P35555         | MFS                     | 1431                           | W                           |
| P35555         | MFS                     | 1431                           | Y                           |
| P35555         | MFS                     | 1513                           | R                           |
| P35555         | MFS                     | 1564                           | F                           |
| P35555         | MFS                     | 1564                           | Y                           |
| P35555         | MFS                     | 1589                           | F                           |
| P35555         | MFS                     | 1610                           | G                           |
| P35555         | MFS                     | 1631                           | G                           |
| P35555         | MFS                     | 1663                           | R                           |
| P35555         | MFS                     | 1663                           | Y                           |
| P35555         | MFS                     | 1770                           | F                           |
| P35555         | MFS                     | 1791                           | R                           |
| P35555         | MFS                     | 1791                           | Y                           |
| P35555         | MFS                     | 1793                           | W                           |
| P35555         | MFS                     | 1806                           | S                           |
| P35555         | MFS                     | 1806                           | Y                           |
| P35555         | MFS                     | 1833                           | S                           |
| P35555         | MFS                     | 1835                           | Y                           |
| P35555         | MFS                     | 1876                           | Y                           |
| P35555         | MFS                     | 1895                           | R                           |
| P35555         | MFS                     | 1900                           | Y                           |
| P35555         | MFS                     | 1928                           | G                           |
| P35555         | MFS                     | 1928                           | R                           |
| P35555         | MFS                     | 1928                           | Y                           |

| <b>Protein</b> | <b>Disease mnemonic</b> | <b>Disulfide bond position</b> | <b>Variant substitution</b> |
|----------------|-------------------------|--------------------------------|-----------------------------|
| P35555         | MFS                     | 1934                           | S                           |
| P35555         | MFS                     | 1971                           | Y                           |
| P35555         | MFS                     | 1977                           | Y                           |
| P35555         | MFS                     | 1984                           | R                           |
| P35555         | MFS                     | 1998                           | Y                           |
| P35555         | MFS                     | 2038                           | Y                           |
| P35555         | MFS                     | 2085                           | R                           |
| P35555         | MFS                     | 2099                           | W                           |
| P35555         | MFS                     | 2111                           | R                           |
| P35555         | MFS                     | 2111                           | Y                           |
| P35555         | MFS                     | 2142                           | Y                           |
| P35555         | MFS                     | 2151                           | W                           |
| P35555         | MFS                     | 2221                           | F                           |
| P35555         | MFS                     | 2221                           | G                           |
| P35555         | MFS                     | 2221                           | S                           |
| P35555         | MFS                     | 2251                           | R                           |
| P35555         | MFS                     | 2258                           | R                           |
| P35555         | MFS                     | 2307                           | S                           |
| P35555         | MFS                     | 2406                           | Y                           |
| P35555         | MFS                     | 2442                           | S                           |
| P35555         | MFS                     | 2442                           | W                           |
| P35555         | MFS                     | 2489                           | R                           |
| P35555         | MFS                     | 2500                           | R                           |
| P35555         | MFS                     | 2500                           | Y                           |
| P35555         | MFS                     | 2511                           | R                           |
| P35555         | MFS                     | 2535                           | W                           |
| P35555         | MFS                     | 2571                           | R                           |
| P35555         | MFS                     | 2581                           | F                           |
| P35555         | MFS                     | 2592                           | S                           |
| P35555         | MFS                     | 2605                           | R                           |
| P35555         | MFS                     | 2605                           | Y                           |
| P35555         | MFS                     | 2646                           | R                           |
| P35555         | MFS                     | 2652                           | G                           |
| P35555         | MFS                     | 2663                           | S                           |
| O00187         | MASPD                   | 156                            | CHNH                        |
| P07911         | MCKD2                   | 148                            | W                           |
| P15260         | MSMD                    | 77                             | Y                           |

| <b>Protein</b> | <b>Disease mnemonic</b> | <b>Disulfide bond position</b> | <b>Variant substitution</b> |
|----------------|-------------------------|--------------------------------|-----------------------------|
| P24043         | MDC1A                   | 862                            | R                           |
| O60220         | MTS                     | 66                             | W                           |
| Q3T906         | MLII                    | 461                            | G                           |
| Q3T906         | MLIIIA                  | 461                            | G                           |
| P15848         | MPS6                    | 117                            | R                           |
| P15848         | MPS6                    | 192                            | R                           |
| P15848         | MPS6                    | 405                            | Y                           |
| P15848         | MPS6                    | 521                            | Y                           |
| P49747         | EDM1                    | 348                            | F                           |
| P49747         | EDM1                    | 371                            | S                           |
| P49747         | EDM1                    | 371                            | Y                           |
| P49747         | EDM1                    | 410                            | Y                           |
| P36897         | MSSE                    | 41                             | Y                           |
| Q8NBK3         | MSD                     | 218                            | Y                           |
| Q96KG7         | EMARDD                  | 326                            | R                           |
| Q96KG7         | EMARDD                  | 774                            | R                           |
| Q2I0M5         | NDNC4                   | 95                             | F                           |
| Q2I0M5         | NDNC4                   | 107                            | R                           |
| Q2I0M5         | NDNC4                   | 118                            | Y                           |
| O60500         | NPHS1                   | 265                            | R                           |
| O60500         | NPHS1                   | 417                            | F                           |
| O60500         | NPHS1                   | 465                            | Y                           |
| O60500         | NPHS1                   | 528                            | F                           |
| O60500         | NPHS1                   | 623                            | F                           |
| P17405         | NPDB                    | 92                             | W                           |
| P17405         | NPDB                    | 157                            | R                           |
| P17405         | NPDB                    | 431                            | R                           |
| O15118         | NPC1                    | 63                             | R                           |
| O15118         | NPC1                    | 74                             | Y                           |
| O15118         | NPC1                    | 113                            | R                           |
| O15118         | NPC1                    | 177                            | G                           |
| O15118         | NPC1                    | 177                            | Y                           |
| O15118         | NPC1                    | 247                            | Y                           |
| P61916         | NPDC2                   | 47                             | F                           |
| P61916         | NPDC2                   | 93                             | F                           |
| P61916         | NPDC2                   | 99                             | R                           |
| O15303         | CSNB1B                  | 522                            | Y                           |

| <b>Protein</b> | <b>Disease mnemonic</b> | <b>Disulfide bond position</b> | <b>Variant substitution</b> |
|----------------|-------------------------|--------------------------------|-----------------------------|
| Q3SXY7         | CSNB1F                  | 328                            | Y                           |
| Q00604         | ND                      | 39                             | R                           |
| Q00604         | ND                      | 55                             | R                           |
| Q00604         | ND                      | 65                             | W                           |
| Q00604         | ND                      | 65                             | Y                           |
| Q00604         | ND                      | 69                             | S                           |
| Q00604         | ND                      | 96                             | W                           |
| Q00604         | ND                      | 96                             | Y                           |
| Q00604         | ND                      | 110                            | G                           |
| Q00604         | ND                      | 110                            | R                           |
| Q00604         | ND                      | 126                            | S                           |
| Q00604         | ND                      | 128                            | R                           |
| P08123         | OII                     | 1195                           | Y                           |
| Q9Y6Q6         | OPTB7                   | 175                            | R                           |
| P07477         | PCTT                    | 139                            | F                           |
| P53634         | PLS                     | 291                            | Y                           |
| P21802         | PS                      | 278                            | F                           |
| P21802         | PS                      | 342                            | G                           |
| P21802         | PS                      | 342                            | R                           |
| P21802         | PS                      | 342                            | S                           |
| P21802         | PS                      | 342                            | Y                           |
| P55268         | PIERSS                  | 321                            | R                           |
| P02458         | PLSD-T                  | 1485                           | G                           |
| P98161         | PKD1                    | 436                            | R                           |
| P98161         | PKD1                    | 508                            | R                           |
| P03952         | PKK deficiency          | 548                            | Y                           |
| P49747         | PSACH                   | 328                            | R                           |
| P49747         | PSACH                   | 348                            | R                           |
| P49747         | PSACH                   | 387                            | G                           |
| P49747         | PSACH                   | 387                            | R                           |
| P49747         | PSACH                   | 410                            | Y                           |
| P49747         | PSACH                   | 448                            | S                           |
| P49747         | PSACH                   | 468                            | Y                           |
| Q13873         | PPH1                    | 117                            | Y                           |
| P82279         | RP12                    | 45                             | W                           |
| P82279         | RP12                    | 157                            | S                           |
| P82279         | RP12                    | 195                            | F                           |

| <b>Protein</b> | <b>Disease mnemonic</b> | <b>Disulfide bond position</b> | <b>Variant substitution</b> |
|----------------|-------------------------|--------------------------------|-----------------------------|
| P82279         | RP12                    | 250                            | W                           |
| P82279         | RP12                    | 891                            | G                           |
| P82279         | RP12                    | 948                            | Y                           |
| P82279         | RP12                    | 1165                           | W                           |
| P82279         | RP12                    | 1174                           | G                           |
| P82279         | RP12                    | 1181                           | R                           |
| Q5T1H1         | RP25                    | 1176                           | R                           |
| Q5T1H1         | RP25                    | 2139                           | Y                           |
| Q5T1H1         | RP25                    | 2911                           | Y                           |
| O75445         | RP39                    | 759                            | F                           |
| P08100         | RP4                     | 110                            | F                           |
| P08100         | RP4                     | 110                            | Y                           |
| O15537         | XLRS1                   | 110                            | Y                           |
| O15537         | XLRS1                   | 142                            | W                           |
| O15537         | XLRS1                   | 219                            | G                           |
| O15537         | XLRS1                   | 219                            | R                           |
| Q01974         | RRS                     | 182                            | Y                           |
| Q9BQB4         | SOST1                   | 167                            | R                           |
| P31785         | XSCID                   | 62                             | G                           |
| P31785         | XSCID                   | 115                            | F                           |
| P31785         | XSCID                   | 115                            | R                           |
| P31785         | XSCID                   | 182                            | R                           |
| P31785         | XSCID                   | 231                            | Y                           |
| P35555         | SGS                     | 1223                           | Y                           |
| O15232         | SEMD-MATN3              | 304                            | S                           |
| P78363         | STGD1                   | 75                             | G                           |
| P78363         | STGD1                   | 1488                           | F                           |
| P78363         | STGD1                   | 1488                           | R                           |
| P78363         | STGD1                   | 1488                           | Y                           |
| P35555         | SSKS                    | 1564                           | S                           |
| P35555         | SSKS                    | 1577                           | G                           |
| Q13253         | SYM1A                   | 184                            | Y                           |
| P37023         | HHT2                    | 51                             | Y                           |
| P37023         | HHT2                    | 77                             | W                           |
| P04196         | THPH11                  | 241                            | R                           |
| P04070         | THPH3                   | 426                            | Y                           |
| P07225         | THPH5                   | 121                            | Y                           |

| <b>Protein</b> | <b>Disease mnemonic</b> | <b>Disulfide bond position</b> | <b>Variant substitution</b> |
|----------------|-------------------------|--------------------------------|-----------------------------|
| P07225         | THPH5                   | 161                            | G                           |
| P07225         | THPH5                   | 175                            | F                           |
| P07225         | THPH5                   | 186                            | Y                           |
| P07225         | THPH5                   | 241                            | S                           |
| P07225         | THPH5                   | 247                            | G                           |
| P07225         | THPH5                   | 265                            | R                           |
| P07225         | THPH5                   | 265                            | W                           |
| P07225         | THPH5                   | 267                            | S                           |
| P07225         | THPH5                   | 449                            | S                           |
| P07225         | THPH5                   | 475                            | R                           |
| P07225         | THPH5                   | 639                            | F                           |
| P07225         | THPH5                   | 639                            | Y                           |
| P07225         | THPH5                   | 666                            | R                           |
| Q76LX8         | TTP                     | 311                            | Y                           |
| Q76LX8         | TTP                     | 347                            | S                           |
| P07202         | TDH2A                   | 808                            | R                           |
| P01266         | TDH3                    | 183                            | Y                           |
| O75445         | USH2A                   | 536                            | R                           |
| O75445         | USH2A                   | 575                            | S                           |
| O75445         | USH2A                   | 759                            | F                           |
| Q96GP6         | VDEGS                   | 258                            | Y                           |
| O75197         | EVR4                    | 1253                           | F                           |
| O75197         | EVR4                    | 1361                           | G                           |
| P04275         | VWD1                    | 1149                           | R                           |
| P04275         | VWD2                    | 1060                           | R                           |
| P04275         | VWD2                    | 1272                           | F                           |
| P04275         | VWD2                    | 1272                           | R                           |
| P04275         | VWD3                    | 2739                           | Y                           |
